# Supplementary material for: Trabectedin and Campthotecin Synergistically Eliminate Cancer Stem Cells in Cell-of-Origin Sarcoma Models
Source: PubMed Central journal article supplement — Neoplasia. 2017 May 8;19(6):460–70. doi: 10.1016/j.neo.2017.03.004 (PMC5421973; doi:10.1016/j.neo.2017.03.004), 2017-05-08
Supplement: mmc2.pdf [file mmc2.pdf]

Table S2. Cancer Stem Cell RT-PCR array

| UniGene | RefSeq    | Symbol       | Description | Gene Name                                                                                                      | Ct Values              |             |                        |             |             |
|---------|-----------|--------------|-------------|----------------------------------------------------------------------------------------------------------------|------------------------|-------------|------------------------|-------------|-------------|
|         |           |              |             |                                                                                                                | Control samples (DMSO) | Trabectedin | Control samples (DMSO) | Trabectedin |             |
| A01     | Hs.404102 | NM_178559    | ABC5        | ATP-binding cassette, sub-family B (MDR/TAP), member 5                                                         | > 35                   | 34.62791824 | > 35                   | 34.6423035  | > 35        |
| A02     | Hs.480218 | NM_004827    | ABC2        | ATP-binding cassette, sub-family G (WHITE), member 2                                                           | 26.56230354            | 25.8560989  | 26.35051346            | 27.2622604  | 27.37802887 |
| A03     | Hs.740441 | NM_001627    | ALCAM       | Activated leukocyte cell adhesion molecule                                                                     | 19.92388643            | 19.42361259 | 19.80594063            | 19.7343826  | 19.73009862 |
| A04     | Hs.76392  | NM_000689    | ALDH1A1     | Aldehyde dehydrogenase 1 family, member A1                                                                     | 32.79160309            | > 35        | > 35                   | 33.8626671  | 32.97221756 |
| A05     | Hs.367437 | NM_000051    | ATM         | Ataxia telangiectasia mutated                                                                                  | 25.48138237            | 26.27412605 | 26.65946007            | 26.8424149  | 26.78168488 |
| A06     | Hs.434961 | NM_000332    | ATXN1       | Ataxin 1                                                                                                       | 28.69910622            | 28.40320015 | 28.8017807             | 30.5985394  | 30.65964127 |
| A07     | Hs.590970 | NM_001699    | AXL         | AXL receptor tyrosine kinase                                                                                   | 22.18443298            | 20.26282501 | 20.64014244            | 21.8316288  | 21.86813736 |
| A08     | Hs.731287 | NM_005180    | BMI1        | BMI1 polycomb ring finger oncogene                                                                             | 22.45745087            | 22.18789673 | 22.56258965            | 23.1816177  | 23.2315788  |
| A09     | Hs.473163 | NM_001719    | BMP7        | Bone morphogenetic protein 7                                                                                   | > 35                   | > 35        | > 35                   | > 35        | 33.67135239 |
| A10     | Hs.844105 | NM_013230    | CD24        | CD24 molecule                                                                                                  | 30.82269669            | 32.01090622 | 32.54096222            | 33.4168358  | 33.58856583 |
| A11     | Hs.374990 | NM_001773    | CD34        | CD34 molecule                                                                                                  | 30.68766548            | > 35        | > 35                   | 32.6550751  | 33.02210236 |
| A12     | Hs.479214 | NM_001775    | CD38        | CD38 molecule                                                                                                  | 29.87600708            | 30.75689507 | 31.24704361            | 31.5987797  | 31.26835251 |
| B01     | Hs.502328 | NM_000610    | CD44        | CD44 molecule (Indian blood group)                                                                             | 18.56589508            | 19.29791641 | 19.6716272             | 19.6790848  | 19.73170471 |
| B02     | Hs.595920 | NM_001274    | CHEK1       | CHK1 checkpoint homolog (S. pombe)                                                                             | 23.50674629            | 23.73058128 | 24.19145012            | 25.1826324  | 25.19819641 |
| B03     | Hs.129452 | NM_004392    | DACH1       | Dachshund homolog 1 (Drosophila)                                                                               | 33.32581329            | > 35        | > 35                   | > 35        | 33.23199844 |
| B04     | Hs.631988 | NM_001954    | DDR1        | Discoidin domain receptor tyrosine kinase 1                                                                    | 27.31806374            | 27.73367119 | 28.23479652            | 28.3424873  | 28.38804054 |
| B05     | Hs.40499  | NM_012242    | DKK1        | Dickkopf homolog 1 (Xenopus laevis)                                                                            | 22.22657585            | 20.5832653  | 20.95852089            | 25.9482021  | 26.21537209 |
| B06     | Hs.379912 | NM_005618    | DLL1        | Delta-like 1 (Drosophila)                                                                                      | 31.80279922            | 32.93321991 | 33.44149399            | > 35        | 32.86523819 |
| B07     | Hs.511076 | NM_019074    | DLL4        | Delta-like 4 (Drosophila)                                                                                      | > 35                   | 32.99955368 | 33.5245018             | > 35        | 33.28374481 |
| B08     | Hs.202672 | NM_001379    | DNMT1       | DNA (cytosine-5)-methyltransferase 1                                                                           | 22.29672813            | 22.27099991 | 22.63268852            | 23.705122   | 23.68962669 |
| B09     | Hs.419815 | NM_001963    | EGF         | Epidermal growth factor                                                                                        | 28.77316284            | 28.79980659 | 29.2942378             | 30.5606823  | 30.58444023 |
| B10     | Hs.76753  | NM_000118    | ENG         | Endoglin                                                                                                       | 21.50151062            | 20.2374856  | 20.62214851            | 21.4084663  | 21.41252576 |
| B11     | Hs.542050 | NM_002354    | EPCAM       | Epithelial cell adhesion molecule                                                                              | 26.84743881            | 26.40687561 | 26.78733063            | 27.5167675  | 27.4060688  |
| B12     | Hs.446352 | NM_004448    | ERBB2       | V-erb-b2 erythroblastic leukemia viral oncogene homolog 2, neuro/glioblastoma derived oncogene homolog (avian) | 25.98839188            | 25.30387878 | 25.69655418            | 27.1840305  | 26.93240166 |
| C01     | Hs.39925  | NM_000126    | ETFA        | Electron-transfer-flavoprotein, alpha polypeptide                                                              | 20.60998726            | 21.49860382 | 21.87090683            | 21.7266579  | 21.78832817 |
| C02     | Hs.533683 | NM_000141    | FGFR2       | Fibroblast growth factor receptor 2                                                                            | > 35                   | > 35        | > 35                   | > 35        | > 35        |
| C03     | Hs.514308 | NM_004475    | FLOT2       | FLOTilin 2                                                                                                     | 22.85070801            | 22.56836319 | 22.95262527            | 22.7822876  | 22.72808456 |
| C04     | Hs.155651 | NM_021764    | FOXA2       | Forkhead box A2                                                                                                | > 35                   | > 35        | > 35                   | 33.8235512  | > 35        |
| C05     | Hs.59368  | NM_032682    | FOXP1       | Forkhead box P1                                                                                                | 24.75917053            | 25.69327736 | 26.18506622            | 27.515173   | 27.43679047 |
| C06     | Hs.173859 | NM_003507    | FZD7        | Frizzled family receptor 7                                                                                     | 28.50328255            | 28.17119789 | 28.55472755            | 30.8813705  | 31.8446269  |
| C07     | Hs.524134 | NM_002051    | GATA3       | GATA binding protein 3                                                                                         | 28.33310127            | 28.94734955 | 29.4601841             | > 35        | > 35        |
| C08     | Hs.445733 | NM_002093    | GSK3B       | Glycogen synthase kinase 3 beta                                                                                | 22.63050079            | 22.50454712 | 22.89160156            | 25.8554382  | 25.86398506 |
| C09     | Hs.88556  | NM_004964    | HDAC1       | Histone deacetylase 1                                                                                          | 22.52911377            | 22.36047745 | 22.73305511            | 22.4518948  | 22.43318176 |
| C10     | Hs.504609 | NM_002165    | ID1         | Inhibitor of DNA binding 1, dominant negative helix-loop-helix protein                                         | 21.19396019            | 21.17887497 | 21.5928241             | 24.7812672  | 24.82170105 |
| C11     | Hs.597664 | NM_001556    | IKBK        | Inhibitor of kappa light polypeptide gene enhancer in B-cells, kinase beta                                     | 23.31573677            | 23.78526878 | 24.28163528            | 25.5839729  | 25.43676376 |
| C12     | Hs.624    | NM_000564    | IL8         | Interleukin 8                                                                                                  | 16.44286728            | 17.71389771 | 18.1779232             | 17.6875439  | 17.66521072 |
| D01     | Hs.420277 | NM_002203    | ITGA2       | Integrin, alpha 2 (CD49, alpha 2 subunit of VLA-2 receptor)                                                    | 20.42224884            | 20.58876038 | 20.95718765            | 21.6125431  | 21.66832733 |
| D02     | Hs.440985 | NM_002295    | ITGA4       | Integrin, alpha 4 (antigen CD49, alpha 4 subunit of VLA-4 receptor)                                            | 23.86099052            | 23.84335518 | 24.33706284            | 23.8097992  | 23.85032272 |
| D03     | Hs.133397 | NM_000210    | ITGA6       | Integrin, alpha 6                                                                                              | 22.55976868            | 22.26154709 | 22.66254549            | 23.1617489  | 23.13596535 |
| D04     | Hs.643813 | NM_002211    | ITGB1       | Integrin, beta 1 (fibronectin receptor, beta polypeptide, antigen CD29 including MDF2, MSK12)                  | 18.85008049            | 18.82515526 | 19.01715776            | 18.3600311  | 18.36811638 |
| D05     | Hs.626544 | NM_002144    | JAG1        | Jagged 1                                                                                                       | 20.19854927            | 20.47935295 | 20.86131477            | 23.7521362  | 23.71759605 |
| D06     | Hs.656213 | NM_004972    | JAK2        | Janus kinase 2                                                                                                 | 25.9797863             | 26.17388916 | 26.5588834             | 29.2331696  | 29.54246521 |
| D07     | Hs.479754 | NM_000222    | KIT         | V-kit Hardy-Zuckerman 4 feline sarcoma viral oncogene homolog                                                  | 29.59159088            | 29.64790535 | 30.10953331            | 33.895874   | 31.31445313 |
| D08     | Hs.1048   | NM_003994    | KITLG       | KIT ligand                                                                                                     | 24.67804718            | 24.41287041 | 24.80122375            | 26.5006809  | 26.31625366 |
| D09     | Hs.567674 | NM_004235    | KLF4        | Kruppel-like factor 4 (gut)                                                                                    | 32.13869476            | 32.26016617 | 32.65725708            | 32.2400742  | 31.96618652 |
| D10     | Hs.376206 | NM_004235    | KLF4        | Kruppel-like factor 4 (gut)                                                                                    | 23.56736565            | 23.51571083 | 23.91942787            | 28.3989743  | 27.58882904 |
| D11     | Hs.549084 | NM_004690    | LATS1       | LATS, large tumor suppressor, homolog 1 (Drosophila)                                                           | 25.4697876             | 25.24213028 | 25.64707375            | 27.3177853  | 26.97112083 |
| D12     | Hs.86154  | NM_024674    | LIN28A      | Lin-28 homolog A (C. elegans)                                                                                  | 30.44051743            | 30.89355087 | 31.39074135            | 32.3061295  | 31.94908714 |
| E01     | Hs.23616  | NM_001004317 | LIN28B      | Lin-28 homolog B (C. elegans)                                                                                  | 26.27332306            | 26.72588348 | 27.21602631            | 29.814146   | 30.27755928 |
| E02     | Hs.631951 | NM_014757    | MAML1       | Mastermind-like 1 (Drosophila)                                                                                 | 24.24419022            | 24.23248482 | 24.62286758            | 28.7018089  | 28.17237282 |
| E03     | Hs.306178 | NM_006343    | MERTK       | C-mer proto-oncogene tyrosine kinase                                                                           | 27.48452187            | 29.93831635 | 30.4275074             | 31.9793987  | 30.65762901 |
| E04     | Hs.712553 | NM_021950    | MS4A1       | Membrane-spanning 4-domains, subfamily A, member 1                                                             | > 35                   | > 35        | > 35                   | 33.8939362  | > 35        |
| E05     | Hs.89603  | NM_001018016 | MUC1        | Mucin 1, cell surface associated                                                                               | 26.93286514            | 27.28312492 | 27.6973362             | 28.274437   | 27.79351234 |
| E06     | Hs.202453 | NM_002467    | MYC         | V-myc myelocytomatosis viral oncogene homolog (avian)                                                          | 19.60655994            | 19.78954315 | 20.26994896            | 25.8964634  | 25.29705681 |
| E07     | Hs.25960  | NM_005378    | MYCN        | V-myc myelocytomatosis viral related oncogene, neuroblastoma derived (avian)                                   | > 35                   | > 35        | > 35                   | > 35        | 33.24306488 |
| E08     | Hs.635882 | NM_024865    | NANOG       | Nanog homeobox                                                                                                 | > 35                   | > 35        | > 35                   | > 35        | 33.41606522 |
| E09     | Hs.618430 | NM_003998    | NFKB1       | Nuclear factor of kappa light polypeptide gene enhancer in B-cells 1                                           | 23.76716614            | 23.51138306 | 23.90315628            | 27.7368603  | 27.81401825 |
| E10     | Hs.709191 | NM_000625    | NOS2        | Nitric oxide synthase 2, inducible                                                                             | > 35                   | 31.9138031  | 32.37431335            | 32.2024269  | 31.38376808 |
| E11     | Hs.496473 | NM_017617    | NOTCH1      | Notch 1                                                                                                        | 26.38088908            | 27.70619202 | 28.19968414            | 30.1515846  | 30.02442741 |
| E12     | Hs.487360 | NM_024408    | NOTCH2      | Notch 2                                                                                                        | 25.39089471            | 26.65628433 | 27.1296196             | 24.7244396  | 24.8890419  |
| F01     | Hs.376675 | NM_000442    | PECAM1      | Platelet/endothelial cell adhesion molecule                                                                    | 29.71582794            | 30.88177109 | 31.38418579            | 31.2753258  | 32.40872955 |
| F02     | Hs.491582 | NM_009030    | PLAT        | Plasminogen activator, tissue                                                                                  | 19.82366753            | 20.81430244 | 21.31004524            | 22.3208504  | 22.37555122 |
| F03     | Hs.466871 | NM_002659    | PLAUR       | Plasminogen activator, urokinase receptor                                                                      | 20.84503555            | 21.29393578 | 21.66718864            | 21.2881584  | 21.246315   |
| F04     | Hs.249184 | NM_002701    | POU5F1      | POU class 5 homeobox 1                                                                                         | 29.6175251             | 30.41489983 | 30.84657669            | 30.6162624  | 30.86624908 |
| F05     | Hs.614734 | NM_008017    | PROM1       | Prominin 1                                                                                                     | 33.83578973            | > 35        | > 35                   | > 35        | 34.70815277 |
| F06     | Hs.494538 | NM_000264    | PTCH1       | Patched 1                                                                                                      | 32.2315712             | 32.09638596 | 32.56744003            | 34.992382   | 34.32325745 |
| F07     | Hs.654514 | NM_002838    | PTPRC       | Protein tyrosine phosphatase, receptor type, C                                                                 | > 35                   | > 35        | > 35                   | 32.850956   | 32.44637299 |
| F08     | Hs.708933 | NM_021818    | SAV1        | Salvador homolog 1 (Drosophila)                                                                                | 23.9196434             | 24.7648716  | 25.22776031            | 25.705891   | 25.62654686 |
| F09     | Hs.389779 | NM_012238    | SIRT1       | Sirtuin 1                                                                                                      | 23.8210392             | 24.44775772 | 24.84237671            | 28.210453   | 28.46232796 |
| F10     | Hs.437846 | NM_005631    | SMO         | Smoothened, frizzled family receptor                                                                           | 33.99341202            | 33.22013855 | 33.62309265            | 33.4996681  | 32.4489212  |
| F11     | Hs.48029  | NM_005985    | SNAI1       | Snail homolog 1 (Drosophila)                                                                                   | 29.88488579            | 29.37061501 | 29.85229874            | 26.8116245  | 26.51868439 |
| F12     | Hs.732963 | NM_003106    | SOX2        | SRX (sex determining region Y)-box 2                                                                           | 27.55083084            | 27.65388298 | 28.12685204            | 34.6294632  | 31.97609138 |
| G01     | Hs.483059 | NM_003150    | STAT3       | Signal transducer and activator of transcription 3 (acute-phase response factor)                               | 22.36824226            | 22.1766243  | 22.56256676            | 22.3148746  | 22.35523987 |
| G02     | Hs.409911 | NM_000116    | TAZ         | Tafazzin                                                                                                       | 25.26664543            | 24.89922333 | 25.39561844            | 26.9404163  | 26.58950996 |
| G03     | Hs.494622 | NM_004612    | TGFR1       | Transforming growth factor, beta receptor 1                                                                    | 24.37067038            | 24.58791924 | 24.97136688            | 24.9587612  | 24.84204674 |
| G04     | Hs.644697 | NM_008288    | THY1        | Thy-1 cell surface antigen                                                                                     | 26.78819466            | 28.1713028  | 28.57745552            | 24.9337387  | 25.3011837  |
| G05     | Hs.644998 | NM_000474    | Twist1      | Twist homolog 1 (Drosophila)                                                                                   | 24.73334694            | 24.18558121 | 24.58621979            | 27.8532696  | 27.95660019 |
| G06     | Hs.422585 | NM_005719    | Twist2      | Twist homolog 2 (Drosophila)                                                                                   | 31.39900017            | 27.67929077 | 28.15622727            | 27.5391064  | 27.5514431  |
| G07     | Hs.249441 | NM_003390    | WEE1        | WEE1 homolog (S. pombe)                                                                                        | 26.04180336            | 25.11119652 | 25.38442879            | 28.2802467  | 28.24520493 |
| G08     | Hs.248164 | NM_005430    | WNT1        | Wingless-type MMTV integration site family, member 1                                                           | > 35                   | 33.72942352 | 34.2198273             | > 35        | 32.89624023 |
| G09     | Hs.484047 | NM_015238    | WWC1        | WW and C2 domain containing 1                                                                                  | 25.32138062            | 25.63728714 | 26.08603287            | 25.847414   | 25.85233498 |
| G10     | Hs.503892 | NM_008106    | YAP1        | Yes-associated protein 1                                                                                       | 23.51221085            | 22.15908241 | 22.57642555            | 22.9452705  | 22.80205727 |
| G11     | Hs.124503 | NM_003075    | ZEB1        | Zinc finger E-box binding homeobox 1                                                                           | 23.14206123            | 23.16839218 | 23                     |             |             |
